# Supplementary material for: Effects of External Radiation Exposure Resulting From the Fukushima Daiichi Nuclear Power Plant Accident on the Health of Residents in the Evacuation Zones: the Fukushima Health Management Survey
Source: PubMed Central journal article supplement (PMC9703929; doi:10.2188/jea.je20210286), 2022-12-05
Supplement: je-32-S084-s001.pdf [file je-32-S084-s001.pdf]

**eTable 1.** Baseline characteristics and covariates in Cox proportional hazards model analyses according to incident or no incident of each outcome

|                                                                | Hypertension  |              | Diabetes mellitus |              | Dyslipidemia  |              | Kidney disease |              | Hyperuricemia |              | Liver dysfunction |              |
|----------------------------------------------------------------|---------------|--------------|-------------------|--------------|---------------|--------------|----------------|--------------|---------------|--------------|-------------------|--------------|
|                                                                | No incident   | Incident     | No incident       | Incident     | No incident   | Incident     | No incident    | Incident     | No incident   | Incident     | No incident       | Incident     |
| Subjects, n (%)                                                | 16,706 (75.5) | 5,416 (24.5) | 32,430 (93.0)     | 2,455 (7.0)  | 18,233 (92.6) | 1,462 (7.4)  | 26,294 (79.2)  | 6,911 (20.8) | 29,654 (84.9) | 5,263 (15.1) | 21,167 (73.6)     | 7,589 (26.4) |
| EDEE, n (%)                                                    |               |              |                   |              |               |              |                |              |               |              |                   |              |
| : <1 mSv                                                       | 11,538 (69.1) | 3,598 (66.4) | 21,806 (67.2)     | 1,585 (64.6) | 12,327 (67.6) | 953 (65.2)   | 17,514 (66.6)  | 4,606 (66.6) | 20,142 (67.9) | 3,459 (65.7) | 14,649 (69.2)     | 5,049 (66.5) |
| : 1–2 mSv                                                      | 3,959 (23.7)  | 1,317 (24.3) | 7,941 (24.5)      | 631 (25.7)   | 4,423 (24.3)  | 365 (25.0)   | 6,551 (24.9)   | 1,686 (24.4) | 7,178 (24.2)  | 1,292 (24.6) | 5,033 (23.8)      | 1,896 (25.0) |
| : ≥2 mSv                                                       | 1,209 (7.2)   | 501 (9.3)    | 2,682 (8.3)       | 239 (9.7)    | 1,482 (8.1)   | 144 (9.9)    | 2,229 (8.5)    | 619 (9.0)    | 2,334 (7.9)   | 512 (9.7)    | 1,486 (7.0)       | 644 (8.5)    |
| Men, n (%)                                                     | 5,325 (31.9)  | 2,328 (43.0) | 12,090 (37.3)     | 1,302 (53.0) | 7,324 (40.2)  | 692 (47.3)   | 10,383 (39.5)  | 2,807 (40.6) | 9,784 (33.0)  | 2,819 (53.6) | 5,546 (26.2)      | 3,397 (44.8) |
| Age at baseline (years), mean (SD)                             | 44.6 (16.4)   | 59.2 (12.9)  | 53.9 (17.2)       | 63.1 (11.8)  | 50.4 (18.4)   | 64.9 (10.5)  | 50.9 (16.7)    | 63.2 (12.4)  | 54.3 (17.2)   | 58.9 (15.3)  | 53.4 (18.3)       | 57.5 (15.6)  |
| BMI (kg/m <sup>2</sup> ), mean (SD)                            | 22.3 (3.4)    | 23.9 (3.4)   | 23.3 (3.5)        | 25.5 (3.6)   | 22.6 (3.5)    | 24.5 (3.5)   | 23.3 (3.7)     | 24.1 (3.5)   | 23.1 (3.5)    | 24.8 (3.6)   | 22.7 (3.3)        | 23.7 (3.5)   |
| Smoking habitus, n (%)                                         | 3,195 (19.1)  | 952 (17.6)   | 5,267 (16.2)      | 399 (16.3)   | 3,218 (17.6)  | 191 (13.1)   | 4,918 (18.7)   | 846 (12.2)   | 4,385 (14.8)  | 1,053 (20.0) | 2,726 (12.9)      | 1,216 (16.0) |
| Heavy drinking, n (%)                                          | 455 (2.7)     | 275 (5.1)    | 1,495 (4.6)       | 165 (6.7)    | 1,100 (6.0)   | 112 (7.7)    | 1,405 (5.3)    | 335 (4.8)    | 961 (3.2)     | 408 (7.8)    | 330 (1.6)         | 327 (4.3)    |
| Living in the following areas at the time of disaster          |               |              |                   |              |               |              |                |              |               |              |                   |              |
| Evacuation areas, <sup>a</sup> n (%)                           | 8,628 (51.6)  | 3,102 (57.3) | 17,061 (52.6)     | 1,483 (60.4) | 9,465 (51.9)  | 891 (60.9)   | 13,766 (52.4)  | 3,945 (57.1) | 15,538 (52.4) | 3,044 (57.8) | 10,512 (49.7)     | 4,409 (58.1) |
| Evacuation order lifted by the end of 2016, <sup>b</sup> n (%) | 10,009 (59.9) | 2,992 (55.2) | 19,232 (59.3)     | 1,344 (54.7) | 10,809 (59.3) | 812 (55.5)   | 15,585 (59.3)  | 3,897 (56.4) | 17,624 (59.4) | 2,905 (55.2) | 12,960 (61.2)     | 4,249 (56.0) |
| Medication                                                     |               |              |                   |              |               |              |                |              |               |              |                   |              |
| : Hypertension, n (%)                                          | 0 (0.0)       | 0 (0.0)      | 8,164 (25.2)      | 1,210 (49.3) | 3,865 (21.2)  | 783 (53.6)   | 5,518 (21.0)   | 2,898 (41.9) | 7,231 (24.4)  | 2,220 (42.2) | 5,140 (24.3)      | 2,398 (31.6) |
| : Diabetes mellitus, n (%)                                     | 324 (1.9)     | 261 (4.8)    | 0 (0.0)           | 0 (0.0)      | 558 (3.1)     | 185 (12.7)   | 1,036 (3.9)    | 508 (7.4)    | 1,443 (4.9)   | 392 (7.4)    | 926 (4.4)         | 428 (5.6)    |
| : Dyslipidemia, n (%)                                          | 1,015 (6.1)   | 642 (11.9)   | 4,104 (12.7)      | 621 (25.3)   | 0 (0.0)       | 0 (0.0)      | 2,946 (11.2)   | 1,495 (21.6) | 4,070 (13.7)  | 993 (18.9)   | 2,656 (12.5)      | 1,260 (16.6) |
| Laboratory data                                                |               |              |                   |              |               |              |                |              |               |              |                   |              |
| : variable 1                                                   | 115.3 (11.8)  | 126.2 (8.9)  | 5.2 (0.3)         | 5.8 (0.4)    | 64.3 (14.8)   | 59.0 (13.9)  | 83.4 (13.8)    | 69.5 (10.0)  | 4.5 (1.0)     | 5.7 (0.8)    | 19.5 (4.0)        | 21.8 (4.3)   |
| : variable 2                                                   | 70.4 (9.1)    | 77.1 (7.4)   |                   |              | 106.0 (20.6)  | 113.7 (20.9) |                |              |               |              | 14.9 (5.1)        | 18.6 (5.5)   |
| : variable 3                                                   |               |              |                   |              |               |              |                |              |               |              | 18.4 (8.0)        | 25.6 (10.8)  |

eTable 1 (continued).

|                                                                | Polycythemia  |              | Anemia        |              | Thrombocytopenia |              | Lymphocytopenia |               | Neutropenia     |               |
|----------------------------------------------------------------|---------------|--------------|---------------|--------------|------------------|--------------|-----------------|---------------|-----------------|---------------|
|                                                                | No incident   | Incident     | No incident   | Incident     | No incident      | Incident     | No incident     | Incident      | No incident     | Incident      |
| Subjects, n (%)                                                | 32,718 (97.7) | 780 (2.3)    | 28,151 (87.2) | 4,119 (12.8) | 31,663 (96.0)    | 1,312 (4.0)  | 32,567 (96.6)   | 1,155 (3.4)   | 32,231 (96.6)   | 1,134 (3.4)   |
| EDEE, n (%)                                                    |               |              |               |              |                  |              |                 |               |                 |               |
| : <1 mSv                                                       | 22,022 (67.3) | 479 (61.4)   | 18,737 (66.6) | 2,862 (69.5) | 21,216 (67.0)    | 887 (67.6)   | 21,851 (67.1)   | 785 (68.0)    | 21,602 (67.0)   | 774 (68.2)    |
| : 1–2 mSv                                                      | 7,975 (24.4)  | 215 (27.6)   | 6,971 (24.8)  | 959 (23.3)   | 7,779 (24.6)     | 318 (24.2)   | 7,960 (24.4)    | 284 (24.6)    | 7,914 (24.6)    | 264 (23.3)    |
| : ≥2 mSv                                                       | 2,722 (8.3)   | 85 (10.9)    | 2,443 (8.7)   | 297 (7.2)    | 2,669 (8.4)      | 107 (8.1)    | 2,756 (8.5)     | 86 (7.4)      | 2,715 (8.4)     | 96 (8.5)      |
| Men, n (%)                                                     | 13,602 (41.6) | 462 (59.2)   | 12,637 (44.9) | 1,379 (33.5) | 13,102 (41.4)    | 685 (52.2)   | 13,788 (42.3)   | 523 (45.3)    | 13,950 (43.3)   | 310 (27.3)    |
| Age at baseline (years), mean (SD)                             | 55.8 (16.8)   | 53.2 (16.1)  | 54.9 (16.7)   | 61.3 (16.1)  | 55.0 (16.9)      | 65.8 (12.4)  | 55.6 (16.8)     | 59.5 (15.9)   | 55.7 (16.9)     | 55.7 (15.7)   |
| Smoking habitus, n (%)                                         | 5,309 (16.2)  | 209 (26.8)   | 5,178 (18.4)  | 371 (9.0)    | 5,397 (17.0)     | 150 (11.4)   | 5,581 (17.1)    | 107 (9.3)     | 5,574 (17.3)    | 78 (6.9)      |
| Heavy drinking, n (%)                                          | 1,645 (5.0)   | 68 (8.7)     | 1,580 (5.6)   | 151 (3.7)    | 1,612 (5.1)      | 84 (6.4)     | 1,710 (5.3)     | 59 (5.1)      | 1,685 (5.2)     | 60 (5.3)      |
| Living in the following areas at the time of disaster          |               |              |               |              |                  |              |                 |               |                 |               |
| Evacuation areas, <sup>a</sup> n (%)                           | 17,522 (53.6) | 500 (64.1)   | 15,266 (54.2) | 2,042 (49.6) | 16,924 (53.5)    | 732 (55.8)   | 17,499 (53.7)   | 643 (55.7)    | 17,381 (53.9)   | 595 (52.5)    |
| Evacuation order lifted by the end of 2016, <sup>b</sup> n (%) | 19,260 (58.9) | 373 (47.8)   | 16,297 (57.9) | 2,589 (62.9) | 18,488 (58.4)    | 759 (57.9)   | 19,090 (58.6)   | 677 (58.6)    | 18,812 (58.4)   | 695 (61.3)    |
| Laboratory data                                                |               |              |               |              |                  |              |                 |               |                 |               |
| : variable 1                                                   | 466.6 (40.3)  | 523.4 (34.8) | 14.7 (1.3)    | 13.4 (1.0)   | 252.1 (54.3)     | 182.5 (32.1) | 2179.8 (624.9)  | 444.6 (350.1) | 3344.2 (1210.2) | 305.1 (862.2) |
| : variable 2                                                   | 14.3 (1.4)    | 15.8 (1.3)   |               |              |                  |              |                 |               |                 |               |
| : variable 3                                                   | 42.7 (3.6)    | 46.9 (3.1)   |               |              |                  |              |                 |               |                 |               |

Variable1:  
SBP (hypertension),  
HbA1c (diabetes mellitus),  
HDL (dyslipidemia),  
eGFR (kidney disease),  
uric acid (hyperuricemia),  
AST (liver dysfunction),  
RBC (polycythemia),  
Hb (anemia),  
PLT (thrombocytopenia),  
lymphocyte count  
(lymphopenia)  
or neutrophil count  
(neutropenia).

Variable2:  
DBP (hypertension),  
LDL (dyslipidemia),  
ALT (liver dysfunction)  
or Hb (polycythemia).

Variable3:  
γ-GTP (liver dysfunction)  
or Ht (polycythemia).

<sup>a</sup>All area of Hirono, Naraha, Tomioka, Kawauchi, Okuma, Futaba, Namie, Katsurao, and Iitate, and part of Tamura, Minami-Soma, Kawamata, and Date.

<sup>b</sup>Hirono, Date, Tamura, Naraha, Kawauchi, Katsurao and Minami-Soma.

**eTable 2.** Hazard ratios (HRs) and 95% confidence intervals for lifestyle-related diseases in the comprehensive health checks from FY2012 to FY2017 according to radiation exposure

| Effective dose           | <1mSv | 1-2mSv           | ≥2mSv            |
|--------------------------|-------|------------------|------------------|
| <b>Hypertension</b>      |       |                  |                  |
| Model 1 HRs              | 1     | 1.02(0.95-1.10)  | 1.29(1.16-1.44)  |
| Model 2a HRs             | 1     | 1.01(0.94-1.09)  | 1.20(1.08-1.33)  |
| Model 2b HRs             | 1     | 1.01(0.94-1.08)  | 1.22(1.09-1.36)  |
| Model 3 HRs              | 1     | 0.99(0.92-1.07)  | 1.13(1.01-1.26)  |
| Model 4 HRs              | 1     | 0.97(0.90-1.04)  | 1.09(0.98-1.22)  |
| <b>Diabetes Mellitus</b> |       |                  |                  |
| Model 1 HRs              | 1     | 1.05(0.93-1.18)  | 1.17(1.02-1.36)  |
| Model 2a HRs             | 1     | 1.03(0.91-1.16)  | 1.06(0.92-1.23)  |
| Model 2b HRs             | 1     | 1.04(0.92-1.17)  | 1.09(0.94-1.27)  |
| Model 3 HRs              | 1     | 1.02(0.90-1.15)  | 1.00(0.86-1.16)  |
| Model 4 HRs              | 1     | 1.04(0.92-1.18)  | 1.01(0.87-1.18)  |
| <b>Dyslipidemia</b>      |       |                  |                  |
| Model 1 HRs              | 1     | 1.06(0.91-1.22)  | 1.28(1.04-1.57)  |
| Model 2a HRs             | 1     | 1.06(0.91-1.22)  | 1.20(0.98-1.46)  |
| Model 2b HRs             | 1     | 1.05(0.91-1.22)  | 1.19(0.95-1.47)  |
| Model 3 HRs              | 1     | 1.05(0.91-1.22)  | 1.12(0.90-1.39)  |
| Model 4 HRs              | 1     | 1.06(0.91-1.23)  | 1.13(0.91-1.40)  |
| <b>Kidney disease</b>    |       |                  |                  |
| Model 1 HRs              | 1     | 0.97(0.91-1.03)  | 1.04(0.95-1.13)  |
| Model 2a HRs             | 1     | 0.96 (0.91–1.02) | 1.01 (0.92–1.10) |
| Model 2b HRs             | 1     | 0.96 (0.90–1.02) | 0.99 (0.90–1.08) |
| Model 3 HRs              | 1     | 0.95 (0.90–1.01) | 0.96 (0.88–1.06) |
| Model 4 HRs              | 1     | 0.96 (0.89–1.02) | 1.04 (0.95–1.14) |
| <b>Hyperuricemia</b>     |       |                  |                  |
| Model 1 HRs              | 1     | 0.99 (0.92–1.06) | 1.16 (1.04–1.29) |
| Model 2a HRs             | 1     | 0.98 (0.91–1.05) | 1.09 (0.98–1.22) |
| Model 2b HRs             | 1     | 0.98 (0.91–1.05) | 1.11 (0.99–1.24) |
| Model 3 HRs              | 1     | 0.97 (0.90–1.04) | 1.05 (0.94–1.18) |
| Model 4 HRs              | 1     | 0.98 (0.90–1.06) | 1.08 (0.96–1.20) |
| <b>Liver dysfunction</b> |       |                  |                  |
| Model 1 HRs              | 1     | 1.03 (0.97–1.09) | 1.17 (1.06–1.29) |
| Model 2a HRs             | 1     | 1.03 (0.97–1.09) | 1.13 (1.03–1.24) |
| Model 2b HRs             | 1     | 1.02 (0.96–1.09) | 1.08 (0.98–1.19) |
| Model 3 HRs              | 1     | 1.02 (0.96–1.08) | 1.05 (0.95–1.15) |
| Model 4 HRs              | 1     | 1.02 (0.96–1.09) | 1.06 (0.96–1.17) |

HRs, hazard ratios.

95% confidence interval is shown in parentheses.

<sup>a</sup> Model 1: Adjusted for age at baseline and sex.

<sup>b</sup> Model 2a: Adjusted for model 1 + BMI (quartiles).

<sup>c</sup> Model 2b: Adjusted for model 1 + evacuation status.

<sup>d</sup> Model 3: Adjusted for model 1 + BMI (quartiles) and evacuation status.

<sup>e</sup> Model 4: Fully adjusted model, as in table 3.

**eTable 3.** Cox proportional hazards model analysis of diseases in the comprehensive health checks from FY2012 to FY2017 (complete case analyses) stratified according to radiation exposure dose

| Effective dose                          | <1 mSv  | 1–2 mSv          | ≥2 mSv           |
|-----------------------------------------|---------|------------------|------------------|
| <b>Hypertension</b>                     |         |                  |                  |
| Number at risk                          | 8,616   | 3,026            | 847              |
| Number of cases                         | 2,074   | 776              | 266              |
| Person years                            | 32,741  | 11,503           | 3,047            |
| Incidence rate /100,000 pys             | 6,334.6 | 6,746.3          | 8,728.5          |
| Age-, sex-adjusted HRs                  | 1       | 1.03 (0.95–1.12) | 1.33 (1.17–1.51) |
| Multivariable-adjusted HRs <sup>a</sup> | 1       | 0.96 (0.88–1.04) | 1.04 (0.91–1.19) |
| <b>Diabetes mellitus</b>                |         |                  |                  |
| Number at risk                          | 13,203  | 4,964            | 1,510            |
| Number of cases                         | 914     | 378              | 131              |
| Person years                            | 57,683  | 21,555           | 6,425            |
| Incidence rate /100,000 pys             | 1,584.5 | 1,753.7          | 2,038.8          |
| Age-, sex-adjusted HRs                  | 1       | 1.06 (0.94–1.20) | 1.20 (1.00–1.44) |
| Multivariable-adjusted HRs <sup>a</sup> | 1       | 1.04 (0.92–1.18) | 1.02 (0.84–1.23) |
| <b>Dyslipidemia</b>                     |         |                  |                  |
| Number at risk                          | 7,467   | 2,754            | 851              |
| Number of cases                         | 584     | 222              | 81               |
| Person years                            | 30,357  | 11,120           | 3,326            |
| Incidence rate /100,000 pys             | 1,923.8 | 1,996.5          | 2,435.0          |
| Age-, sex-adjusted HRs                  | 1       | 1.03 (0.88–1.20) | 1.21 (0.96–1.53) |
| Multivariable-adjusted HRs <sup>a</sup> | 1       | 1.03 (0.88–1.20) | 1.05 (0.82–1.34) |
| <b>Kidney disease</b>                   |         |                  |                  |
| Number at risk                          | 12,507  | 4,763            | 1,478            |
| Number of cases                         | 2,701   | 1,007            | 350              |
| Person years                            | 48,526  | 18,683           | 5,824            |
| Incidence rate /100,000 pys             | 5,566.1 | 5,390.1          | 6,009.3          |
| Age-, sex-adjusted HRs                  | 1       | 0.95 (0.89–1.03) | 1.04 (0.93–1.16) |
| Multivariable-adjusted HRs <sup>a</sup> | 1       | 0.93 (0.86–1.00) | 1.05 (0.93–1.18) |
| <b>Hyperuricemia</b>                    |         |                  |                  |
| Number at risk                          | 13,361  | 4,893            | 1,469            |
| Number of cases                         | 1,991   | 745              | 284              |
| Person years                            | 55,021  | 20,027           | 5,822            |
| Incidence rate /100,000 pys             | 3,618.6 | 3,719.9          | 4,878.1          |
| Age-, sex-adjusted HRs                  | 1       | 0.98 (0.90–1.07) | 1.22 (1.07–1.38) |
| Multivariable-adjusted HRs <sup>a</sup> | 1       | 0.98 (0.90–1.07) | 1.07 (0.94–1.22) |
| <b>Liver dysfunction</b>                |         |                  |                  |
| Number at risk                          | 11,159  | 4,030            | 1,078            |
| Number of cases                         | 2,972   | 1,128            | 331              |
| Person years                            | 42,327  | 15,063           | 3,870            |
| Incidence rate /100,000 pys             | 7,021.6 | 7,488.7          | 8,552.2          |
| Age-, sex-adjusted HRs                  | 1       | 1.03 (0.96–1.11) | 1.13 (1.01–1.26) |
| Multivariable-adjusted HRs <sup>a</sup> | 1       | 1.02 (0.95–1.10) | 0.98 (0.87–1.10) |

eTable 3 (continued).

| Effective dose                          | <1 mSv  | 1–2 mSv          | ≥2 mSv           |
|-----------------------------------------|---------|------------------|------------------|
| <b>Polycythemia</b>                     |         |                  |                  |
| Number at risk                          | 12,855  | 4,760            | 1,476            |
| Number of cases                         | 279     | 132              | 41               |
| Person years                            | 56,529  | 20,924           | 6,422            |
| Incidence rate /100,000 pys             | 493.6   | 630.9            | 638.5            |
| Age-, sex-adjusted HRs                  | 1       | 1.22 (1.00–1.51) | 1.18 (0.85–1.65) |
| Multivariable-adjusted HRs <sup>a</sup> | 1       | 1.14 (0.92–1.40) | 1.00 (0.71–1.40) |
| <b>Anemia</b>                           |         |                  |                  |
| Number at risk                          | 12,276  | 4,552            | 1,438            |
| Number of cases                         | 1,700   | 597              | 177              |
| Person years                            | 51,106  | 19,110           | 5,980            |
| Incidence rate /100,000 pys             | 3,326.4 | 3,124.0          | 2,959.7          |
| Age-, sex-adjusted HRs                  | 1       | 0.95 (0.86–1.04) | 0.94 (0.80–1.09) |
| Multivariable-adjusted HRs <sup>a</sup> | 1       | 1.07 (0.98–1.18) | 1.27 (1.08–1.48) |
| <b>Thrombocytopenia</b>                 |         |                  |                  |
| Number at risk                          | 12,568  | 4,685            | 1,467            |
| Number of cases                         | 546     | 194              | 75               |
| Person years                            | 54,285  | 20,419           | 6,290            |
| Incidence rate /100,000 pys             | 1,005.8 | 950.1            | 1,192.3          |
| Age-, sex-adjusted HRs                  | 1       | 0.92 (0.78–1.08) | 1.12 (0.88–1.42) |
| Multivariable-adjusted HRs <sup>a</sup> | 1       | 0.99 (0.84–1.17) | 1.18 (0.92–1.51) |
| <b>Lymphopenia</b>                      |         |                  |                  |
| Number at risk                          | 12,922  | 4,770            | 1,492            |
| Number of cases                         | 543     | 199              | 57               |
| Person years                            | 56,343  | 20,835           | 6,479            |
| Incidence rate /100,000 pys             | 963.7   | 955.1            | 879.8            |
| Age-, sex-adjusted HRs                  | 1       | 0.98 (0.83–1.15) | 0.90 (0.68–1.18) |
| Multivariable-adjusted HRs <sup>a</sup> | 1       | 1.02 (0.86–1.20) | 0.93 (0.71–1.23) |
| <b>Neutropenia</b>                      |         |                  |                  |
| Number at risk                          | 12,766  | 4,724            | 1,476            |
| Number of cases                         | 484     | 168              | 54               |
| Person years                            | 55,510  | 20,616           | 6,381            |
| Incidence rate /100,000 pys             | 871.9   | 814.9            | 846.3            |
| Age-, sex-adjusted HRs                  | 1       | 0.96 (0.81–1.14) | 1.05 (0.79–1.39) |
| Multivariable-adjusted HRs <sup>a</sup> | 1       | 0.98 (0.82–1.17) | 1.18 (0.88–1.57) |

HRs, hazard ratios; pys, person-years.

<sup>a</sup> Multivariable-adjusted HRs were adjusted for age at baseline, sex, smoking habit, heavy drinking, biochemical value(s) at baseline and evacuation status. BMI (quartiles) and medication (hypertension, diabetes mellitus, dyslipidemia) were also adjusted for lifestyle-related diseases. The 95% confidence interval is in parentheses.
